# Supplementary material for: AO-resistant shape memory polyimide/silica composites with excellent thermal stability and mechanical properties
Source: Royal Society of Chemistry journal article supplement (doi:10.1039/c5ra12293g), 2015-01-01
Supplement: c5ra12293g1.pdf [file c5ra12293g1.pdf]

## Supporting Information

### AO-resistant Shape Memory Polyimide/Silica Composites with Excellent Thermal Stability and Mechanical Properties

Zenghui Yang,<sup>a,b</sup> Qihua Wang,<sup>a,\*</sup> Yongkang Bai<sup>a,b</sup> and Tingmei Wang<sup>a</sup>

<sup>a</sup> State Key Laboratory of Solid Lubrication, Lanzhou Institute of Chemical Physics, Chinese Academy of Sciences, Lanzhou, 730000, P. R. China.

<sup>b</sup> University of Chinese Academy of Sciences, Beijing, 100039, P. R. China

\*Corresponding author: Qihua Wang (E-mail address: Wangqh@licp.cas.cn)

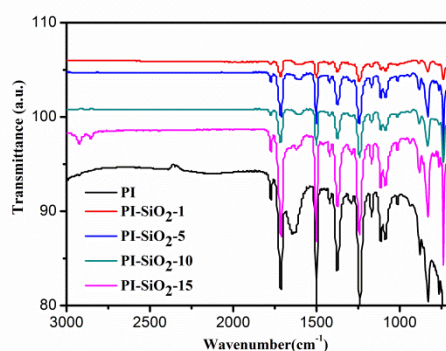

**Figure.S1** FT-IR for pristine PI and PI/SiO<sub>2</sub> composite films

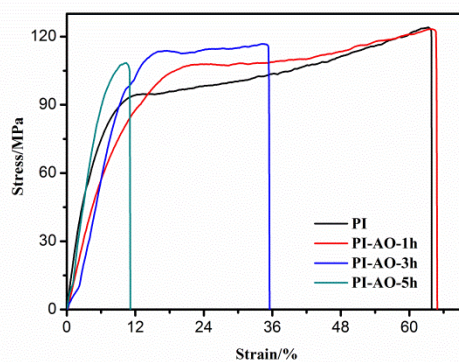

**Figure.S2** Tensile stress versus strain curves of pristine PI with different AO exposure time

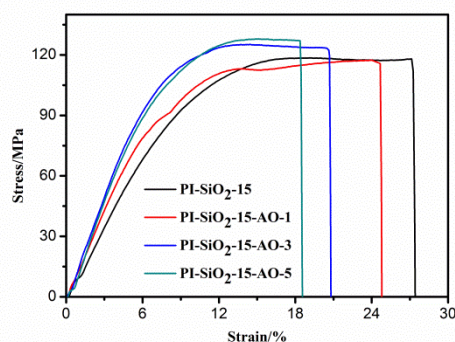

**Figure.S3** Tensile stress-versus strain curves of PI-SiO<sub>2</sub>-15 with different AO exposure time

**Table.S1** Shape fixation and shape recovery ratio for PI/silica composite films

|             | R <sub>f</sub> (%) |       |       |       |       | R <sub>r</sub> (%) |       |       |       |       |
|-------------|--------------------|-------|-------|-------|-------|--------------------|-------|-------|-------|-------|
|             | N=1                | N=2   | N=3   | N=4   | N=5   | N=1                | N=2   | N=3   | N=4   | N=5   |
| Pristine PI | 98.82              | 98.93 | 97.80 | 97.68 | 97.60 | 75.31              | 89.50 | 89.58 | 90.14 | 89.57 |
|             | ±0.1               | ±0.9  | ±0.2  | ±0.5  | ±0.7  | ±0.3               | ±0.1  | ±0.0  | ±0.0  | ±0.1  |
|             | 3                  | 6     | 1     | 5     | 3     | 0                  | 0     | 3     | 5     | 9     |
| PI-1        | 99.17              | 98.64 | 98.65 | 98.29 | 98.24 | 77.05              | 83.33 | 88.02 | 90.86 | 86.42 |
|             | ±0.0               | ±0.0  | ±0.0  | ±0.0  | ±0.0  | ±0.0               | ±0.0  | ±0.1  | ±0.0  | ±0.1  |
|             | 7                  | 5     | 4     | 5     | 3     | 5                  | 3     | 3     | 4     | 5     |
| PI-5        | 98.46              | 97.64 | 97.66 | 97.28 | 97.05 | 82.85              | 87.69 | 88.74 | 89.85 | 93.25 |
|             | ±0.0               | ±0.0  | ±0.1  | ±0.1  | ±0.0  | ±0.1               | ±0.0  | ±0.2  | ±0.0  | ±0.0  |
|             | 3                  | 6     | 0     | 2     | 6     | 2                  | 1     | 5     | 8     | 5     |
| PI-10       | 98.50              | 97.71 | 97.69 | 97.37 | 97.91 | 77.25              | 84.48 | 85.18 | 91.23 | 89.70 |
|             | ±0.1               | ±0.1  | ±0.0  | ±0.1  | ±0.0  | ±0.1               | ±0.4  | ±0.4  | ±0.0  | ±0.1  |
|             | 8                  | 4     | 3     | 1     | 7     | 3                  | 3     | 9     | 5     | 5     |
| PI-15       | 98.63              | 97.65 | 97.69 | 97.35 | 97.45 | 77.72              | 89.80 | 90.25 | 92.45 | 92.91 |
|             | ±0.0               | ±0.3  | ±0.1  | ±0.1  | ±0.1  | ±0.4               | ±0.1  | ±0.2  | ±0.0  | ±0.0  |
|             | 3                  | 5     | 0     | 8     | 4     | 0                  | 3     | 6     | 5     | 3     |
| PI-AO-1     | 98.90              | 98.05 | 97.52 | 97.08 | 96.84 | 79.35              | 88.35 | 88.81 | 89.23 | 93.36 |
|             | ±0.1               | ±0.0  | ±0.1  | ±0.1  | ±0.0  | ±0.0               | ±0.3  | ±0.0  | ±0.1  | ±0.4  |
|             | 5                  | 5     | 2     | 1     | 5     | 3                  | 0     | 2     | 0     | 5     |
| PI-AO-3     | 98.79              | 97.85 | 97.35 | 97.13 | 96.87 | 79.95              | 88.63 | 92.54 | 91.83 | 92.56 |
|             | ±0.1               | ±0.1  | ±0.0  | ±0.0  | ±0.0  | ±0.0               | ±0.1  | ±0.1  | ±0.0  | ±0.0  |
|             | 1                  | 7     | 5     | 8     | 6     | 4                  | 2     | 5     | 4     | 2     |
| PI-AO-5     | 98.93              | 98.42 | 98.16 | 98.82 | 97.51 | 79.10              | 90.62 | 88.53 | 85.52 | 88.82 |
|             | ±0.0               | ±0.1  | ±0.1  | ±0.4  | ±0.2  | ±0.0               | ±0.0  | ±0.1  | ±2.8  | ±1.3  |
|             | 6                  | 4     | 7     | 2     | 3     | 3                  | 2     | 4     | 0     | 2     |
| PI-15-AO-1  | 98.62              | 97.53 | 97.36 | 96.54 | 95.59 | 76.50              | 84.81 | 90.46 | 90.54 | 90.26 |
|             | ±0.0               | ±0.4  | ±0.5  | ±0.3  | ±0.1  | ±0.1               | ±0.1  | ±0.1  | ±0.4  | ±0.1  |
|             | 6                  | 2     | 6     | 8     | 5     | 1                  | 8     | 7     | 8     | 2     |
| PI-15-AO-3  | 98.89              | 98.36 | 97.36 | 96.65 | 96.37 | 71.54              | 89.31 | 88.23 | 89.19 | 90.65 |
|             | ±0.0               | ±0.1  | ±0.2  | ±0.3  | ±0.1  | ±0.3               | ±0.3  | ±0.3  | ±0.0  | ±0.7  |
|             | 5                  | 7     | 3     | 4     | 4     | 1                  | 8     | 0     | 9     | 8     |
| PI-15-AO-5  | 98.85              | 98.02 | 97.72 | 97.19 | 96.87 | 77.72              | 89.67 | 89.27 | 88.25 | 89.50 |
|             | ±0.0               | ±0.0  | ±0.1  | ±0.5  | ±0.2  | ±0.2               | ±0.2  | ±0.0  | ±0.1  | ±0.3  |
|             | 4                  | 5     | 2     | 6     | 1     | 4                  | 7     | 7     | 8     | 9     |
